# Supplementary material
Source: publisher site journal article supplement (https://www.dovepress.com/get_supplementary_file.php?f=363892.docx)

| **Supplementary Table 1. Baseline Characteristics of Patients (Patients failing NPPV vs Patients with IMV)** | | | |
| --- | --- | --- | --- |
| **Characteristic** | **Patients failing NPPV (N=165)** | **Patients with IMV (N=844)** | ***P* Value** |
| Age, years | 78.0 (67.0-83.0) | 76.0 (63.5-84.0) | 0.428**†** |
| APACHE II score | 25 (20-30) | 27 (22-33) | **<.001†** |
| GCS | 15 (10-15) | 9 (6-15) | **<.001†** |
| Male sex | 92 (55.76%) | 498 (59.00%) | 0.439 |
| Initial ventilation venue  Intensive care unit  Ward  Comorbidity | 108 (65.45%)  57 (34.55%) | 816 (96.68%)  28 (3.32%) | **<.001** |
| Neuromuscular disease | 34 (20.61%) | 48 (5.69%) | **<.001** |
| Chronic lung disease | 44 (26.67%) | 11 (1.30%) | **<.001** |
| Ischemic heart disease | 62 (37.58%) | 61 (7.23%) | **<.001** |
| Cancer | 33 (20.00%) | 30 (3.55%) | **<.001** |
| Chronic renal disease | 29 (17.58%) | 23 (2.73%) | **<.001** |
| Hypertension | 38 (23.03%) | 67 (7.94%) | **<.001** |
| Diabetes mellitus | 36 (21.82%) | 67 (7.94%) | **<.001** |
| Liver disease | 5 (3.03%) | 7 (0.83%) | **0.033** |
| Autoimmune disease | 1 (0.61%) | 3 (0.36%) | 0.511 |
| Cause of respiratory failure |  |  | **<.001** |
| COPD | 21 (12.73%) | 27 (3.20%) |  |
| Pneumonia | 64 (38.79%) | 220 (26.07%) |  |
| Cardiogenic pulmonary edema | 42 (25.45%) | 75 (8.89%) |  |
| Miscellaneous | 38 (23.03%) | 522 (61.85%) |  |
| Data are presented as median (25th-75th percentile) or n (%). Significant values are showing in bold.  † Continuous data was performed as Wilcoxon rank sum test.  Abbreviations: NPPV, non-invasive positive pressure ventilation; IMV, intermittent mandatory ventilation; APACHE, acute physiology and chronic health evaluation; GCS, Glasgow coma scale; COPD, chronic obstruction pulmonary disease. | | | |

| **Supplementary Table 2. Adjusted Odds Ratio for Outcomes (Patients with IMV vs Patients failing NPPV)** | | | | |
| --- | --- | --- | --- | --- |
|  | **Number (percent)** | |  | |
| **Outcome** | **Patients with IMV (N=844)** | **Patients failing NPPV (N=165)** | **Adjusted ORa (95% CI)** | ***P* Value** |
| Length of stay in hospital, days  <14  14-<21  21-<28  ≥28 | 251 (29.74%)  122 (14.45%)  122 (14.45%)  349 (41.35%) | 23 (13.94%)  19 (11.52%)  14 (8.48%)  109 (66.06%) | Reference  0.48 (0.20-1.16)  0.43 (0.16-1.18)  0.18 (0.09-0.37) | 0.101  0.102  **<.001** |
| Duration of invasive ventilation, days  <7  7-<14  14-<21  ≥21 | 352 (41.71%)  169 (20.02%)  80 (9.48%)  243 (28.79%) | 51 (30.91%)  33 (20.00%)  24 (14.55%)  57 (34.55%) | Reference  0.37 (0.19-0.75)  0.41 (0.18-0.94)  0.43 (0.23-0.81) | **0.006**  **0.036**  **0.009** |
| Admission to respiratory care center | 136 (16.11%) | 38 (23.03%) | 0.74 (0.48-1.56) | 0.632 |
| In-hospital mortality | 272 (32.23%) | 70 (42.42%) | 0.71 (0.40-135.) | 0.322 |
| RCW/Home ventilator | 74 (8.77%) | 22 (13.33%) | 0.25 (0.11-0.54) | **<.001** |
| Significant values are showing in bold. a Adjusted for age, sex, APACHEII, GCS, initial ventilation venue, comorbidities and cause of respiratory failure.  Abbreviations: OR, odds ratio; NPPV, non-invasive positive pressure ventilation; IMV, intermittent mandatory ventilation; RCW, respiratory care ward. | | | | |

| **Supplementary Table 3. Subgroup Analyses for Outcomes (Patients with IMV vs Patients failing NPPV)** | | | | | | | | | | |
| --- | --- | --- | --- | --- | --- | --- | --- | --- | --- | --- |
|  | | **Length of stay in hospital≥28 days** | | | **Duration of invasive ventilation≥7 days** | | | **RCW/Home ventilator** | | |
| **Variable** | **No.** | **Events** | **Adjusted OR (95% CI)** | ***P* Valuec** | **Events** | **Adjusted OR (95% CI)** | ***P* Valuec** | **Events** | **Adjusted OR (95% CI)** | ***P* Valuec** |
| Overall | 1,009 | 458 | 0.30 (0.18-0.50) a |  | 606 | 0.39 (0.23-0.65) a |  | 96 | 0.25 (0.11-0.57) a |  |
|  |  |  |  | .71 |  |  | .76 |  |  | .55 |
| COPD | 48 | 24 | 0.21 (0.01-4.60) b |  | 29 | 0.34 (0.01-7.94) b |  | 8 | NA d |  |
| Non-COPD | 961 | 434 | 0.40 (0.25-0.65) b |  | 577 | 0.50 (0.31-0.83) b |  | 88 | 0.27 (0.12-0.60) b |  |
|  |  |  |  | .86 |  |  | .77 |  |  | .63 |
| Pneumonia | 284 | 156 | 0.33 (0.14-0.80) b |  | 204 | 0.45 (0.18-1.15) b |  | 30 | 0.14 (0.03-0.59) b |  |
| Non-pneumonia | 725 | 302 | 0.36 (0.20-0.66) b |  | 402 | 0.46 (0.26-0.84) b |  | 66 | 0.36 (0.13-1.06) b |  |
|  |  |  |  | .39 |  |  | .06 |  |  | .41 |
| Cardiogenic pulmonary edema | 117 | 33 | 0.20 (0.06-0.70) b |  | 42 | 0.13 (0.04-0.47) b |  | 6 | 0.31 (0.03-3.80) b |  |
| Non-cardiogenic pulmonary edema | 892 | 425 | 0.32 (0.18-0.57) b |  | 564 | 0.49 (0.28-0.87) b |  | 90 | 0.21 (0.09-0.52) b |  |
|  |  |  |  | .26 |  |  | .93 |  |  | .76 |
| Miscellaneous | 560 | 245 | 0.30 (0.13-0.73) b |  | 331 | 0.47 (0.20-1.12) b |  | 52 | 0.33 (0.06-1.95) b |  |
| Non-miscellaneous | 449 | 213 | 0.36 (0.19-0.68) b |  | 275 | 0.37 (0.19-0.71) b |  | 44 | 0.29 (0.11-0.78) b |  |
| Significant values are showing in bold. a Adjusted for age, sex, APACHEII, GCS, initial ventilation venue, comorbidities and cause of respiratory failure. b Adjusted for age, sex, APACHEII, GCS, initial ventilation venue and comorbidities. c *P*value for interaction; < .05 indicates a significant interaction between treatment outcome and the stratified covariate. d Not available (NA) due to a low sample size.  Abbreviations: OR, Odds Ratio; NPPV, non-invasive positive pressure ventilation; IMV, intermittent mandatory ventilation; RCW, respiratory care ward. | | | | | | | | | | |

**Supplementary Figure 1** Stratified Analyses for Outcomes (Patients with IMV vs Patients failing NPPV)


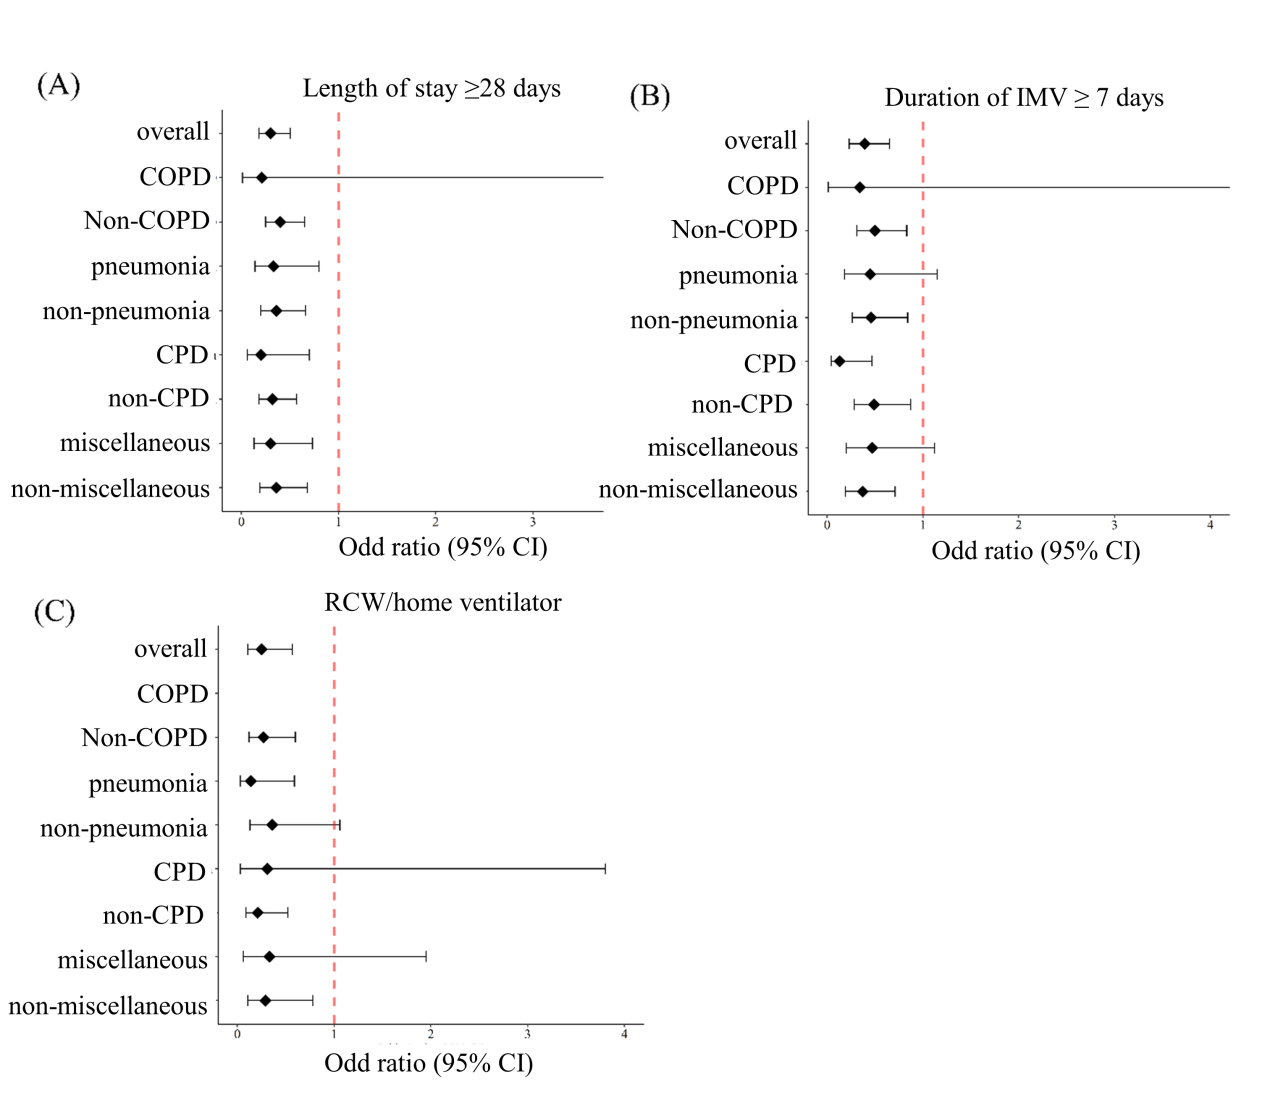

Supplement: Supplementary file 1 [file get_supplementary_file.php]
